# Supplementary material for: Impact of Frailty on Post-Treatment Dysphagia in Patients with Head and Neck Cancer
Source: Springer Nature journal article supplement (doi:10.1007/s00455-024-10754-7), 2024-08-28
Supplement: MOESM1 [file 455_2024_10754_MOESM1_ESM.pdf]

**Supplementary table 1.** Overview of the geriatric assessment and outcome measures questionnaires and cut-off scores

| Domains              | Variables                  | Questionnaires                 | Score ranges          | Cut-off points                                                       |
|----------------------|----------------------------|--------------------------------|-----------------------|----------------------------------------------------------------------|
| Geriatric assessment |                            |                                |                       |                                                                      |
| Physical             | Comorbidity                | ACE 27                         | 0-3                   | 0 = None<br>1 = Mild<br>2 = Moderate<br>3 = Severe                   |
|                      | Intoxication               | History of smoking             | N.A.                  | Never<br>Former<br>Current                                           |
|                      |                            | History of alcohol consumption | N.A.                  | Never<br>Former<br>Current                                           |
|                      | Nutrition                  | MUST                           | 0-6                   | 0 = Low risk<br>1 = Medium risk<br>≥2 = High risk                    |
| Functional           | Mobility                   | TUG                            | N.A.                  | <13.5 = No restrictions<br>≥13.5 = Declined mobility                 |
|                      | Activities of Daily Living | Katz-ADL                       | 0-6                   | <1 = No restrictions<br>≥1 = Restrictions                            |
|                      |                            | Lawton-IADL                    | 0-7                   | <1 = No restrictions<br>≥1 = Restrictions                            |
|                      | Fall risk                  | Fall risk                      | 0-1                   | 0 = No risk<br>1 = Risk                                              |
| Psychological        | Cognition                  | MMSE                           | 0-30                  | >24 = Normal cognitive function<br>≤24 = Declined cognitive function |
|                      | Depression                 | GDS-15                         | 0-15                  | <6 = No depression<br>≥6 = Depression                                |
|                      | Delirium risk              | Delirium risk                  | 0-5                   | 0 = No risk<br>≥1 = Risk                                             |
| Frailty              | Frailty screening          | GFI                            | 0-15                  | <4 = Non-frail<br>≥4 = Frail                                         |
|                      |                            | G8                             | 0-17                  | >14 = Non-frail<br>≤14 = Frail                                       |
| Outcome measures     |                            |                                |                       |                                                                      |
| Quality of Life      | Swallowing Quality of Life | HNSW-QoL                       | Four questions 1-4    | N/A (continuous variable)                                            |
|                      |                            |                                | Total score 4-16      |                                                                      |
|                      |                            |                                | Total raw score 0-100 |                                                                      |

Hurtado-Oliva J., van der Laan H.P., de Vries J., Steenbakkers R.J.H.M., Halmos G.B., Wegner I (2024). Impact of Frailty on Post-Treatment Dysphagia in Patients with Head and Neck Cancer, Journal of Dysphagia, doi: <https://doi.org/10.1007/s00455-024-10754-7>

|                                  |          |           |     |                           |
|----------------------------------|----------|-----------|-----|---------------------------|
| Treatment related adverse events | Toxicity | CTCAE – D | 0-5 | N/A (continuous variable) |
|----------------------------------|----------|-----------|-----|---------------------------|

*Legend: ACE = Adult Comorbidity Evaluation 27; MUST = Malnutrition Universal Screening Tool; TUG = Timed Up & Go; Katz-ADL = Katz Index of Activities of Daily Living; Lawton-IADL = Lawton Index of Instrumental Activities of Daily Living; MMSE = Mini Mental State Examination ; GDS-15 = Geriatric Depression Scale ; GFI = Groningen Frailty Indicator; G8 = Geriatric Screening Tool; HNSW-QoL = EORTC QLQ – H&N35 Swallowing domain; CTCAE-D = Common Terminology Criteria for Adverse Events – Dysphagia.*

**Supplementary figure 1.** Flowchart diagram of patients cohort for analysis.

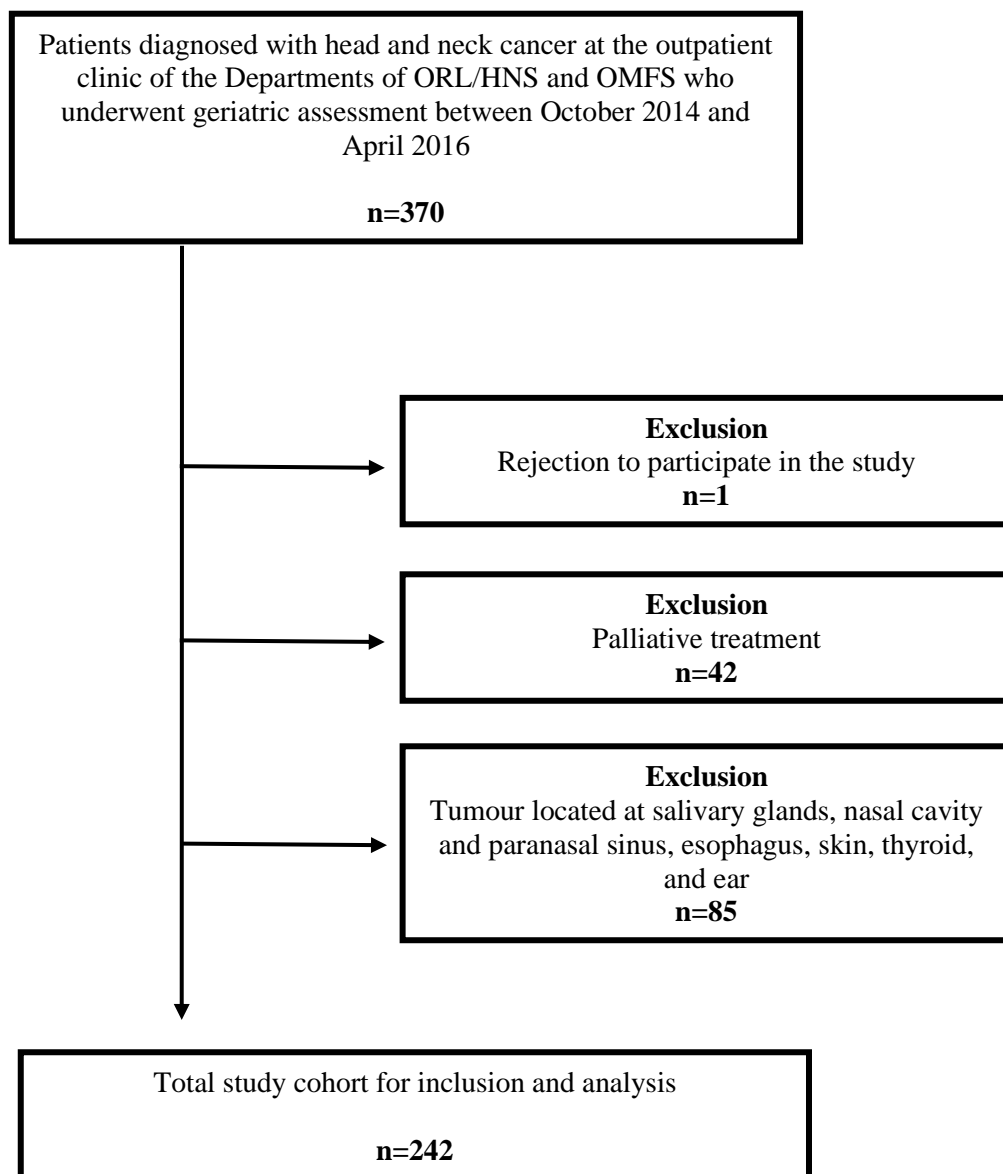

*Legend: ORL/HNS = otorhinolaryngology/head and neck surgery; OMFS = oral and maxillofacial surgery.*
